# Supplementary material for: SeqHound: biological sequence and structure database as a platform for bioinformatics research
Source: Springer Nature journal article supplement (doi:10.1186/1471-2105-3-32), 2002-10-25

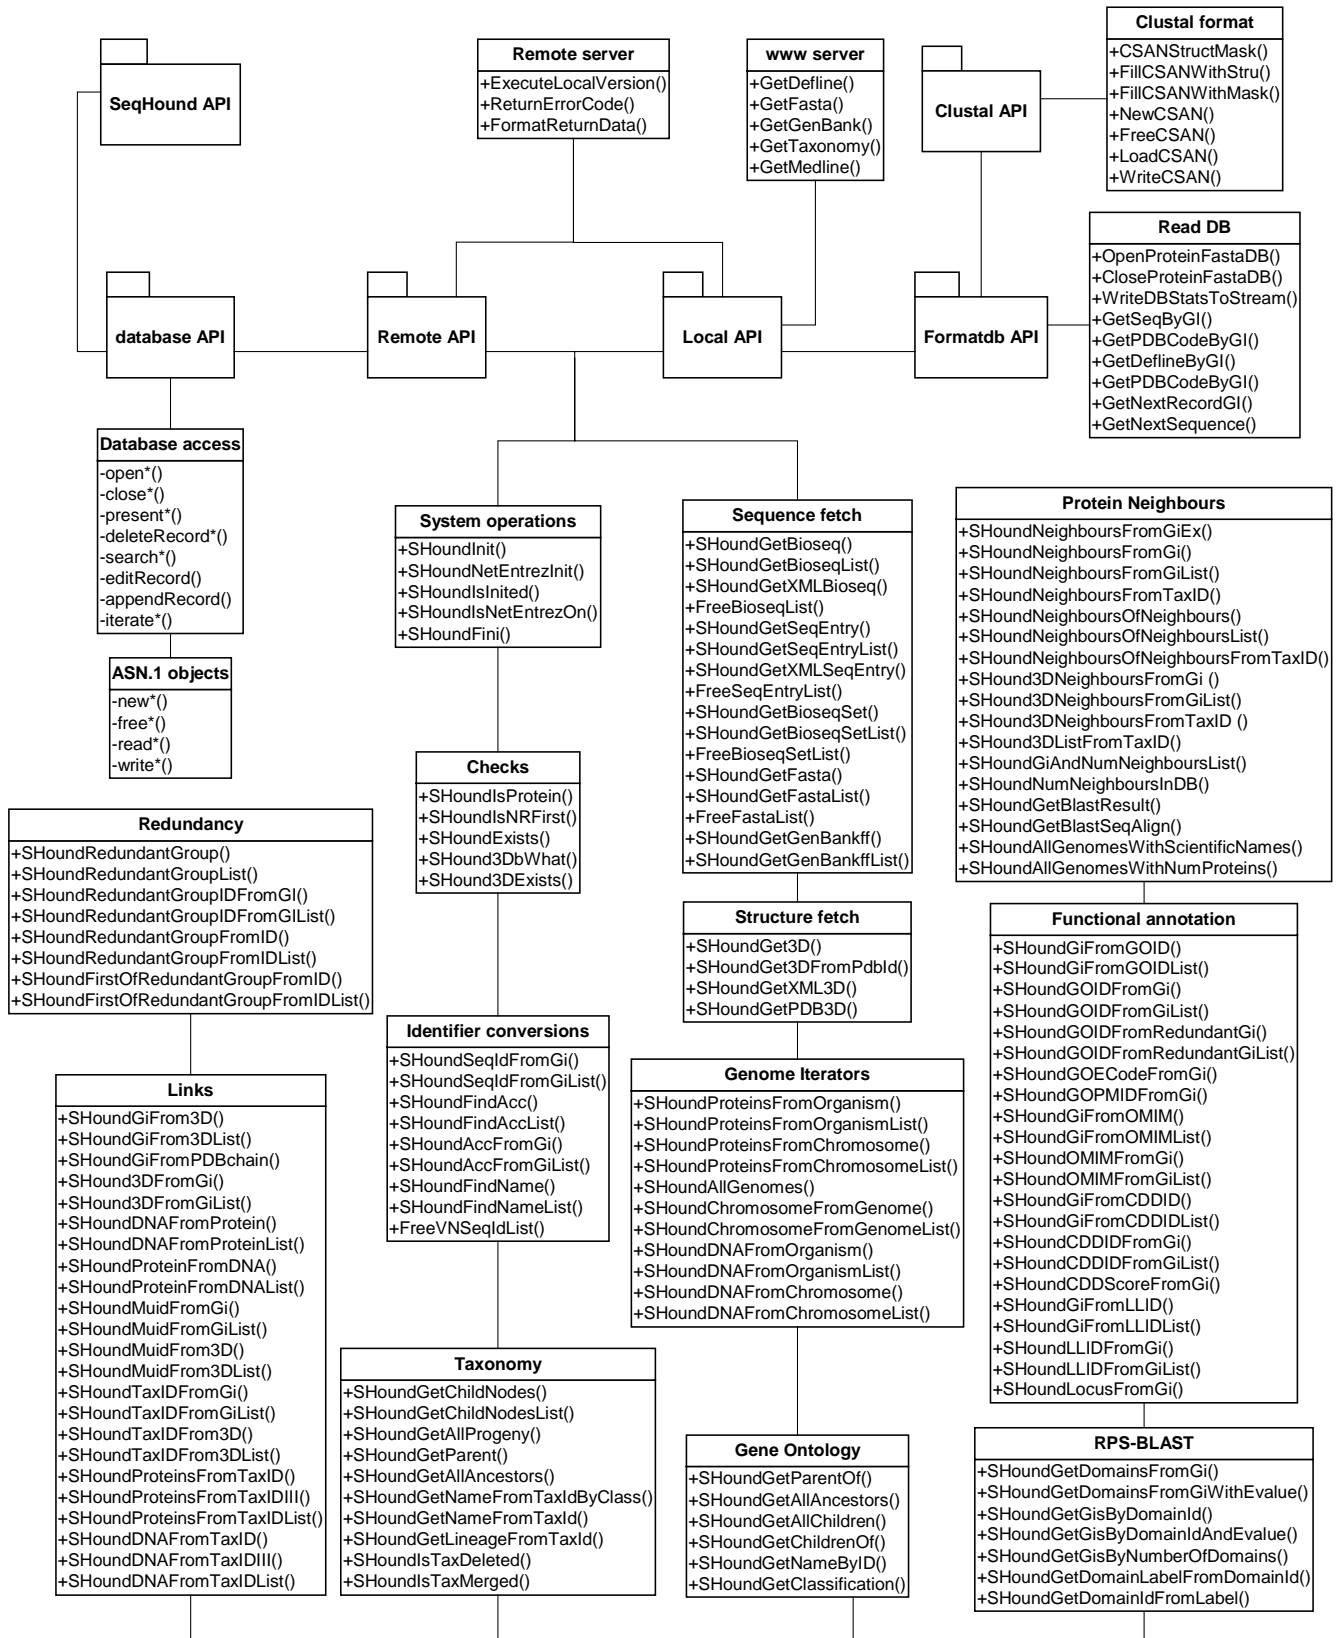

Supplement: 12859_2002_42_MOESM4_ESM.pdf [file 12859_2002_42_MOESM4_ESM.pdf]
