# Supplementary material for: SeqHound: biological sequence and structure database as a platform for bioinformatics research
Source: Springer Nature journal article supplement (doi:10.1186/1471-2105-3-32), 2002-10-25
Supplement: 12859_2002_42_MOESM5_ESM.pdf [file 12859_2002_42_MOESM5_ESM.pdf]

CLUSTAL X

!SS\_gi | 230779 | pdb | 2TS1 | .AAAAAAAAA...bBBb.AAAAAAAAAA..bBBBBBBb...bbbb..aAAAAAAAAAAAA  
gi | 230779 | pdb | 2TS1 | MDLLAELQWRGLVNQTTDEDGLRKLLENEERVTLYCGFDPTADSLHIGHLATILTMRRFQQ

!SS\_gi | 230779 | pdb | 2TS1 | a.bBBBBBBb..aaa.....AAAAAAAAAAAAAAAAAa.....bbBB  
gi | 230779 | pdb | 2TS1 | AGHRPIALVGGATGLIGDPSGKKSERTLNAKETVEAWSARIKEQLGRFLDFEADGNPAKI

!SS\_gi | 230779 | pdb | 2TS1 | BBbaaaa...aAAAAAAAAaaaa..aaaaa..aaa.....aaaaaaAAAAAAAAAAAA  
gi | 230779 | pdb | 2TS1 | KNNYDWIGPLDVITFLRDVGKHFVSNYMMAKESVQSR IETGISFTEFSYMLQAYDFLRL

!SS\_gi | 230779 | pdb | 2TS1 | AAAa..BBBBBB...AAAAAAAAAAAAAAAAAa....bBBBBB.....bb  
gi | 230779 | pdb | 2TS1 | YETEGCRLQIGGSDQWGNITAGLELIRKTKGEARAFGLTIPLVTKADGTFKFGKTESGTIW

!SS\_gi | 230779 | pdb | 2TS1 | bb....AAAAAAAAA.....AAAAAAAAA.....AAAAAAAAAAAAA.....AAAAA  
gi | 230779 | pdb | 2TS1 | LDKEKTSPEFYQFWINTDDR DVIRYLKYFTFLSKEEIEALEQELREAPEKRAAQKTLAE

!SS\_gi | 230779 | pdb | 2TS1 | AAAAAA..AAAAAAAAAAAA.....  
gi | 230779 | pdb | 2TS1 | EVTKLVHGEEALRQAIRISEALFSGDIANLTAAEIEQGFKDVPSFVHEGGDVPLVELLVS

!SS\_gi | 230779 | pdb | 2TS1 | .....  
gi | 230779 | pdb | 2TS1 | AGISPSKRQAREDIQNGAIYVNGERLQDVGAILTAEHRLEGRFTVIRRGKKKYYLIRYA
